# Supplementary material for: Nematode community responses to range‐expanding and native plant communities in original and new range soils
Source: PubMed Central journal article supplement (PMC6206179; doi:10.1002/ece3.4505), 2018-10-02
Supplement: ECE3-8-10288-s001.pdf [file ECE3-8-10288-s001.pdf]

**Appendix S1:** overview of soil collections for original and new range soil. Coordinates for the collection sites are given for three sub-locations per collection area in each of the three countries where soil was collected. Non-sterilized soil from each sub-location was used in one of the 9 soil mixtures of either the original range (O) or the new range (N). Note that we accounted for potential abiotic between the new range and original range soil mixes by the addition of sterilized soil from the complementing range (see methods).

| Range                | Location ID | Sub-location | Coordinates           | Mix    |
|----------------------|-------------|--------------|-----------------------|--------|
| Austria (AU)         |             |              |                       |        |
| Original             | 1           | AU 1.1       | N 48.26557 E 13.24619 | O1     |
|                      |             | AU 1.2       | N 48.30533 E 13.30192 | O2     |
|                      |             | AU 1.3       | N 48.30513 E 13.30614 | O3     |
|                      | 2           | AU 2.1       | N 48.32249 E 14.33575 | O4     |
|                      |             | AU 2.2       | N 48.31162 E 14.33176 | O5     |
|                      |             | AU 2.3       | N 48.32202 E 14.31814 | O6     |
|                      | 3           | AU 3.1       | N 48.31063 E 14.33555 | O7     |
|                      |             | AU 3.2       | N 48.31239 E 14.33491 | O8     |
|                      |             | AU 3.3       | N 48.30348 E 14.33887 | O9     |
| Slovenia (SL)        |             |              |                       |        |
| Original             | 1           | SL 1.1       | N 46.37294 E 14.16777 | O6     |
|                      |             | SL 1.2       | N 46.37294 E 14.16777 | O7     |
|                      |             | SL 1.3       | N 46.37294 E 14.16777 | O3     |
|                      | 2           | SL 2.1       | N 45.92891 E 15.50848 | O1     |
|                      |             | SL 2.2       | N 45.92891 E 15.50848 | O5     |
|                      |             | SL 2.3       | N 45.93038 E 15.49567 | O2     |
|                      | 3           | SL 3.1       | N 46.13559 E 14.60972 | O9     |
|                      |             | SL 3.2       | N 46.16527 E 14.75565 | O8     |
|                      |             | SL 3.3       | N 45.96904 E 14.54572 | O4     |
| The Netherlands (NL) |             |              |                       |        |
| New                  | 1           | NL 1.1       | N 51.87657 E 6.00357  | N1, N7 |
|                      |             | NL 1.2       | N 51.87937 E 6.00413  | N2, N8 |
|                      |             | NL 1.3       | N 51.86766 E 5.99216  | N3, N9 |
|                      | 2           | NL 2.1       | N 51.85399 E 5.88374  | N1, N4 |
|                      |             | NL 2.2       | N 51.85884 E 5.88557  | N2, N5 |
|                      |             | NL 2.3       | N 51.86067 E 5.89020  | N3, N6 |
|                      | 3           | NL 3.1       | N 51.89423 E 5.63424  | N4, N7 |
|                      |             | NL 3.2       | N 51.89265 E 5.64489  | N5, N8 |
|                      |             | NL 3.3       | N 51.89569 E 5.64446  | N6, N9 |
