# Supplementary material for: Nematode community responses to range‐expanding and native plant communities in original and new range soils
Source: PubMed Central journal article supplement (PMC6206179; doi:10.1002/ece3.4505), 2018-10-02
Supplement: ECE3-8-10288-s002.pdf [file ECE3-8-10288-s002.pdf]

**Appendix S2:** Shoot and root biomass (g) of the plant communities ‘natives’ (NAT), ‘related range-expanders’ (RRE) and ‘unrelated range-expanders’ (URE) in original and new range soils.

| <b>Community (N=9)</b> | <b>Shoot biomass (g)</b> |          | <b>Root biomass (g)</b> |          |
|------------------------|--------------------------|----------|-------------------------|----------|
|                        | Mean                     | $\pm$ SE | Mean                    | $\pm$ SE |
| NAT Original           | 10.93                    | 0.44     | 16.64                   | 0.76     |
| NAT New                | 11.81                    | 0.61     | 17.04                   | 0.94     |
| RRE Original           | 12.44                    | 0.67     | 14.86                   | 0.71     |
| RRE New                | 13.33                    | 0.64     | 16.22                   | 0.47     |
| URE Original           | 20.28                    | 0.74     | 6.19                    | 0.28     |
| URE New                | 21.53                    | 0.99     | 6.63                    | 0.56     |
